# Supplementary material for: Molecular characterization of organic aerosols in the Kathmandu Valley, Nepal: insights into primary and secondary sources
Source: Copernicus journal article supplement (doi:10.5194/acp-2018-704), 2018-08-03
Supplement: Supplementary file 1 [file acp-2018-704-supplement.pdf]

1 **Molecular characterization of organic aerosols in the Kathmandu Valley, Nepal:**  
2 **insights into primary and secondary sources**

3

4 Xin Wan<sup>1,8</sup>, Shichang Kang<sup>2,7</sup>, Maheswar Rupakheti<sup>3,4</sup>, Qianggong Zhang<sup>1,7</sup>, Lekhendra Tripathi<sup>2</sup>,  
5 Junming Guo<sup>2</sup>, Pengfei Chen<sup>2</sup>, Dipesh Rupakheti<sup>2</sup>, Arnico K. Panday<sup>5</sup>, Mark G. Lawrence<sup>3</sup>, Kimitaka  
6 Kawamura<sup>6</sup>, Zhiyuan Cong<sup>1,7\*</sup>

7

8 <sup>1</sup> Key Laboratory of Tibetan Environment Changes and Land Surface Processes, Institute of Tibetan  
9 Plateau Research, Chinese Academy of Sciences (CAS), Beijing 100101, China

10 <sup>2</sup> State Key Laboratory of Cryospheric Science, Northwest Institute of Eco-Environment and Resources,  
11 CAS, Lanzhou 730000, China

12 <sup>3</sup> Institute for Advanced Sustainability Studies (IASS), Potsdam 14467, Germany

13 <sup>4</sup> Himalayan Sustainability Institute (HIMSI), Kathmandu, Nepal

14 <sup>5</sup> International Centre for Integrated Mountain Development (ICIMOD), Kathmandu, Nepal

15 <sup>6</sup> Chubu Institute for Advanced Studies, Chubu University, Kasugai 487-8501, Japan

16 <sup>7</sup> CAS Center for Excellence in Tibetan Plateau Earth Sciences, Beijing 100101, China

17 <sup>8</sup> University of Chinese Academy of Sciences, Beijing 100039, China

18

19 \*Corresponding author:

20 E-mail address: zhiyuancong@itpcas.ac.cn

## Supporting Information

Table S1 Recoveries and MDLs of the target compounds

| Compounds                   | Addition<br>(ppb) (n=6) | Recovery (%) | MDLs (ng m <sup>-3</sup> ) |
|-----------------------------|-------------------------|--------------|----------------------------|
| Levogluconan                | 100                     | 81.6 ± 10.4  | 0.08                       |
| Mannosan                    | 100                     | 80.7 ± 11.7  | 0.07                       |
| Galactosan                  | 100                     | 76.3 ± 9.43  | 0.07                       |
| p-Hydroxybenzoic acid       | 100                     | 80.8 ± 9.78  | 0.07                       |
| Vanillic acid               | 100                     | 79.4 ± 11.5  | 0.11                       |
| Syringic acid               | 100                     | 78.6 ± 14.2  | 0.11                       |
| Dehydroabietic acid         | 100                     | 85.4 ± 13.4  | 0.11                       |
| Glucose                     | 100                     | 86.2 ± 13.2  | 0.05                       |
| Fructose                    | 100                     | 86.5 ± 9.57  | 0.06                       |
| Trehalose                   | 100                     | 80.9 ± 10.4  | 0.13                       |
| Sucrose                     | 100                     | 82.2 ± 12.6  | 0.08                       |
| Xylose                      | 100                     | 81.7 ± 10.1  | 0.09                       |
| Mannitol                    | 100                     | 80.6 ± 7.25  | 0.12                       |
| Arabitol                    | 100                     | 85.8 ± 8.57  | 0.06                       |
| Sorbitol                    | 100                     | 77.5 ± 11.1  | 0.12                       |
| Erythritol                  | 100                     | 90.8 ± 3.80  | 0.07                       |
| Diethyl                     | 100                     | 87.7 ± 10.0  | 0.12                       |
| Di-n-butyl                  | 100                     | 89.5 ± 11.5  | 0.12                       |
| Bis-(2-ethylhexy)           | 100                     | 89.9 ± 5.36  | 0.12                       |
| Malic acid                  | 100                     | 76.4 ± 5.44  | 0.13                       |
| Pinic acid                  | 100                     | 76.1 ± 7.85  | 0.10                       |
| cis-Pinonic acid            | 100                     | 73.9 ± 5.00  | 0.08                       |
| Azelaic acid                | 100                     | 87.2 ± 6.77  | 0.11                       |
| Methyl-β-D-xylanopyranoside | 100                     | 90.1 ± 13.2  |                            |
| D <sub>3</sub> -malic acid  | 100                     | 70.5 ± 14.6  |                            |

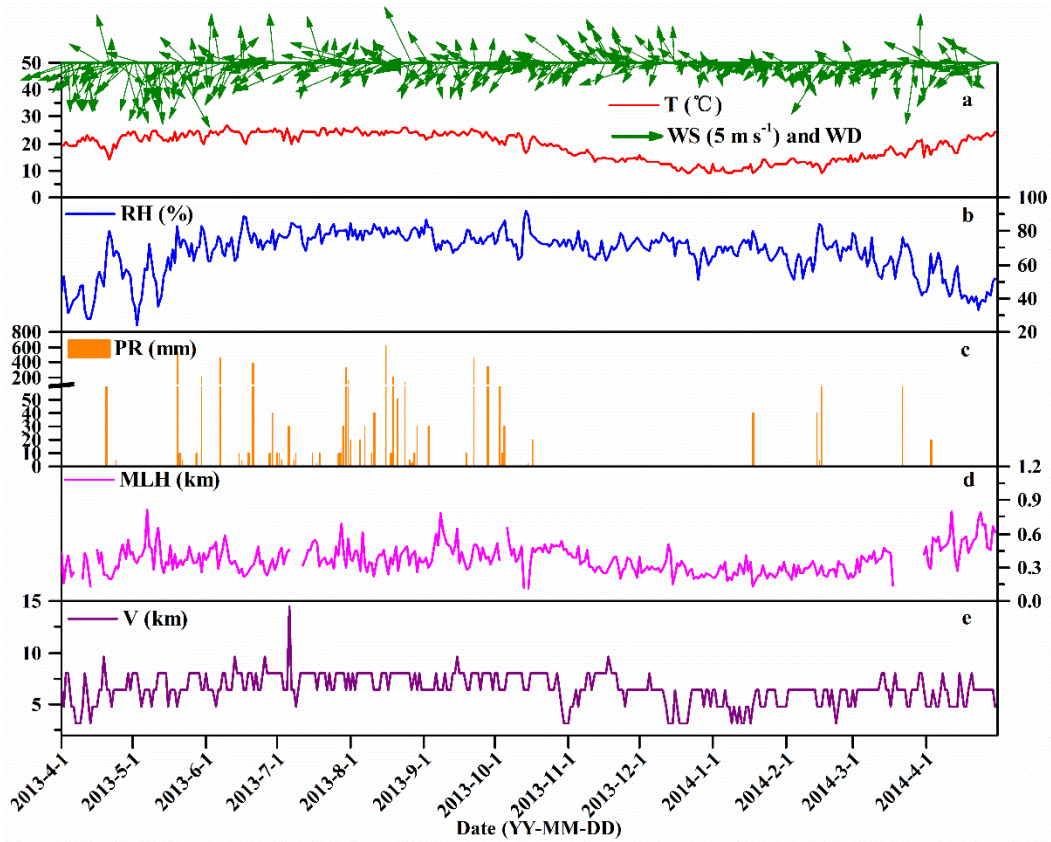

24

25 **Fig. S1.** Temporal variations of (a) wind speed (WS), wind direction (WD), temperature (T), (b) relative  
 26 humidity (RH), (c) precipitation (PR), and (e) visibility (V) monitored at Tribhuvan International Airport  
 27 and (d) mixing layer height (MLH) from Vaisala ceilometer at Bode site, Kathmandu Valley from April  
 28 2013 to April 2014.

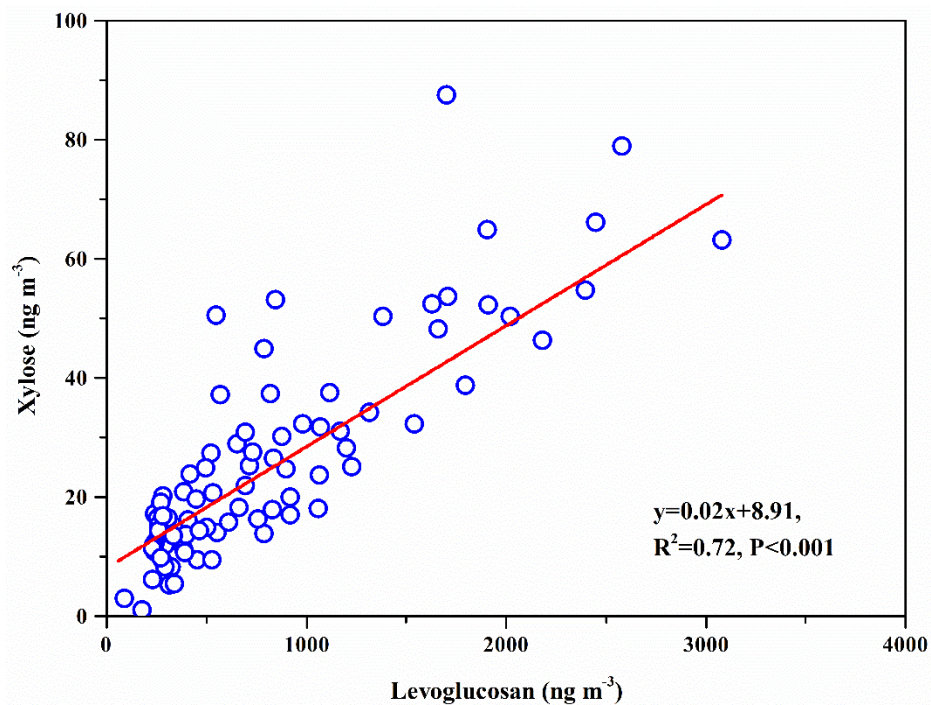

29

30 **Fig. S2.** Correlations between levoglucosan and xylose during the sampling period (April 2013 to April  
31 2014).

32

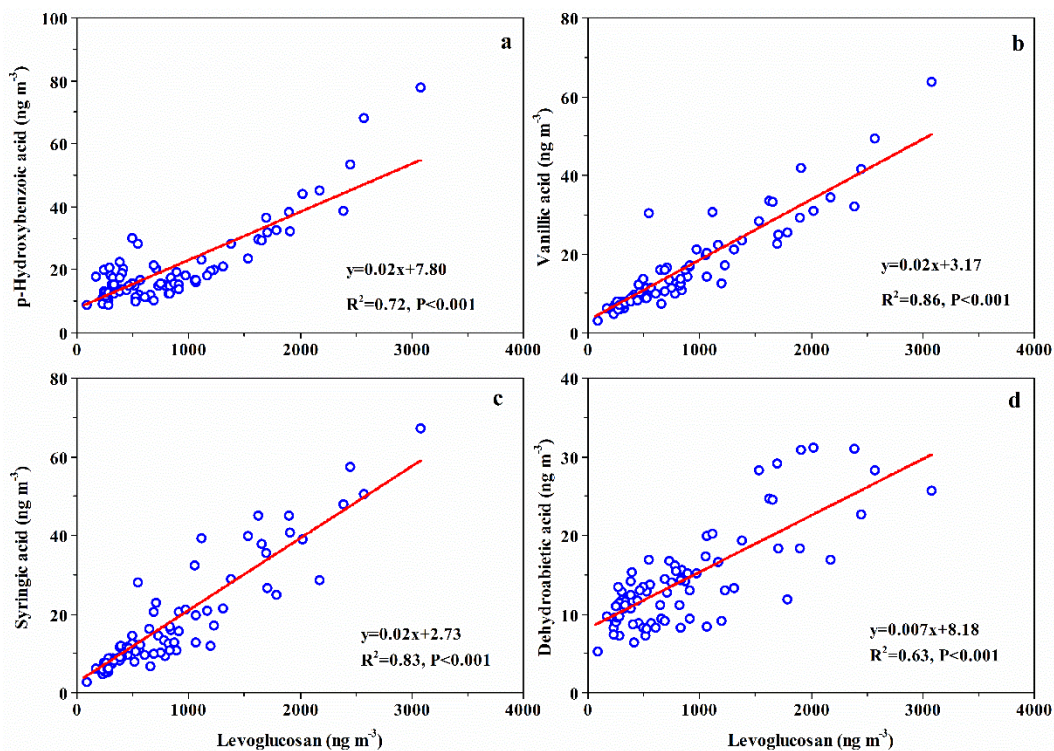

33

34 **Fig. S3.** Correlations between (a) levoglucosan and p-hydroxybenzoic acid, (b) levoglucosan and vanillic  
 35 acid, (c) levoglucosan and syringic acid, (d) levoglucosan and dehydroabietic acid in Bode aerosols during  
 36 the whole year (April 2013 to April 2014).

37

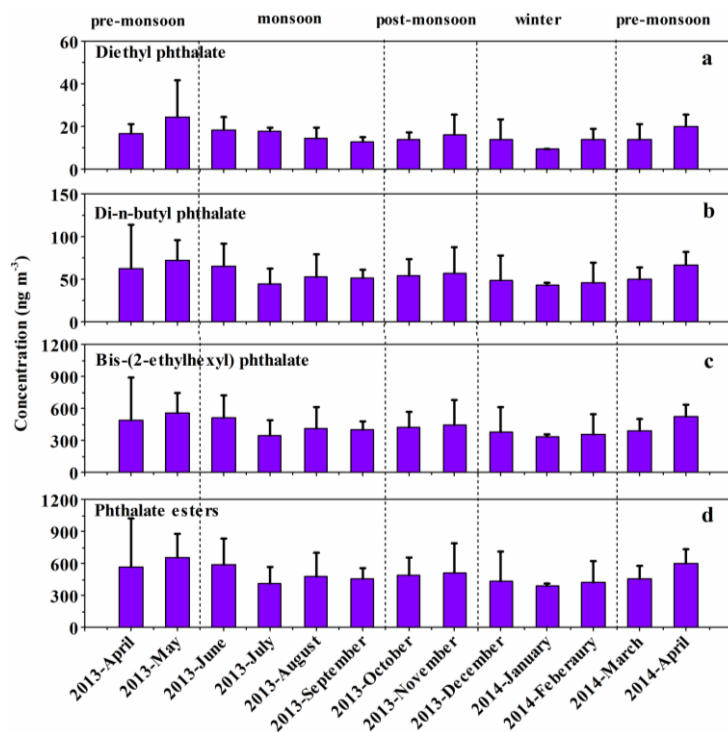

38

39 **Fig. S4.** Monthly variations of phthalate esters at Bode site, Kathmandu Valley during April 2013-April  
 40 2014.

41

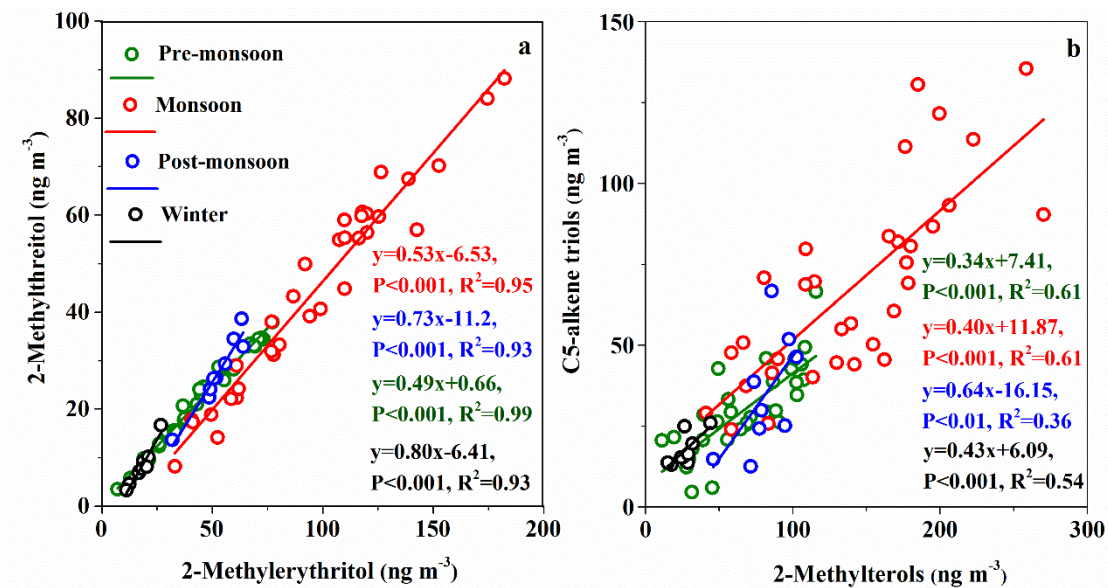

42

43 **Fig. S5.** Correlations between (a) 2-methylthreitol and 2-methylerythritol, (b) C5-alkene triols and 2-  
 44 methylterols in Bode aerosols during the sampling period (April 2013 to April 2014).

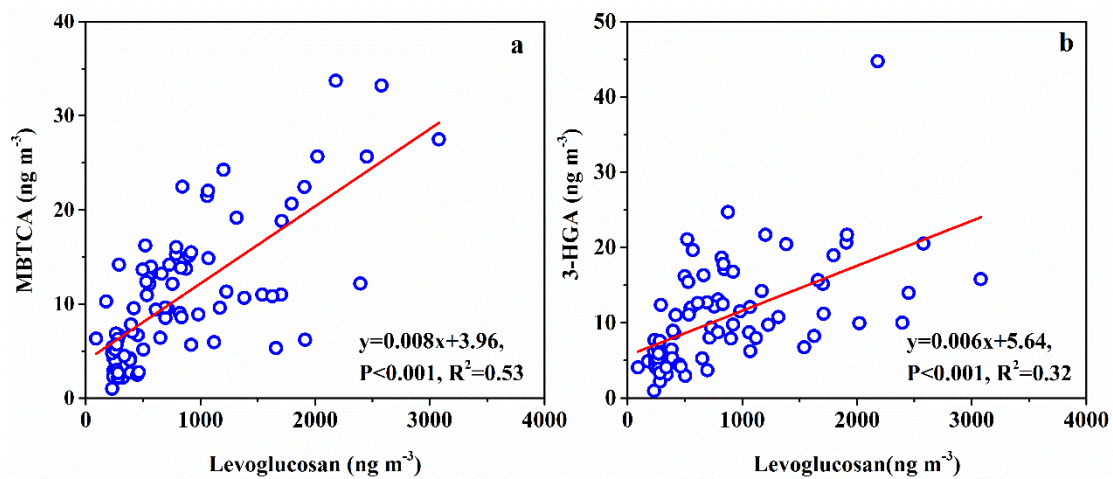

45

46 **Fig. S6.** Correlations between (a) MBTCA and levoglucosan, (b) 3-HGA and levoglucosan in Bode  
47 aerosols during the sampling period (April 2013 to April 2014).
